# Supplementary material for: Fabrication of Mn2+-Doped Hollow Mesoporous Aluminosilica Nanoparticles for Magnetic Resonance Imaging and Drug Delivery for Therapy of Colorectal Cancer
Source: Hindawi journal article supplement (doi:10.1155/2019/3525143), 2019-11-03
Supplement: f1 [file 3525143.f1.docx]

**Supporting Information**

**Fabrication of Mn2+-doped hollow mesoporous aluminosilica nanoparticles for magnetic resonance imaging and drug delivery for therapy of colorectal cancer**

Yue Lu 1,2# , Shirui Zhao 1#, Xin-an Zhang 1*

1 School of Kinesiology, Shenyang Sport University, Shenyang 110102, Liaoning, China

2 Anorectal Ward  Ⅲ，The third Affiliated Hospital of Liaoning University of Traditional Chinese Medicine , Shenyang 110003,Liaoning,China

# Both authors contributed equally to this work

* Corresponding author, Xin-an Zhang, E-mail: zhangxa2725@163.com.


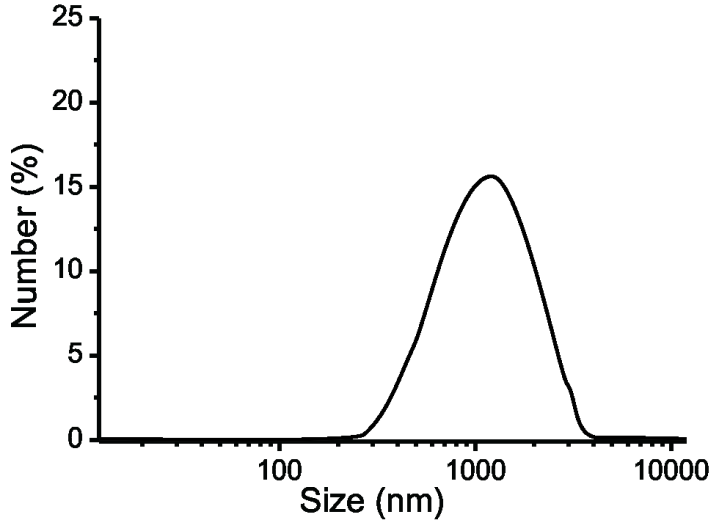


**Figure S1.** Size distrubution of the [Mn]-HMAS nanoparticles in aqueous solution.


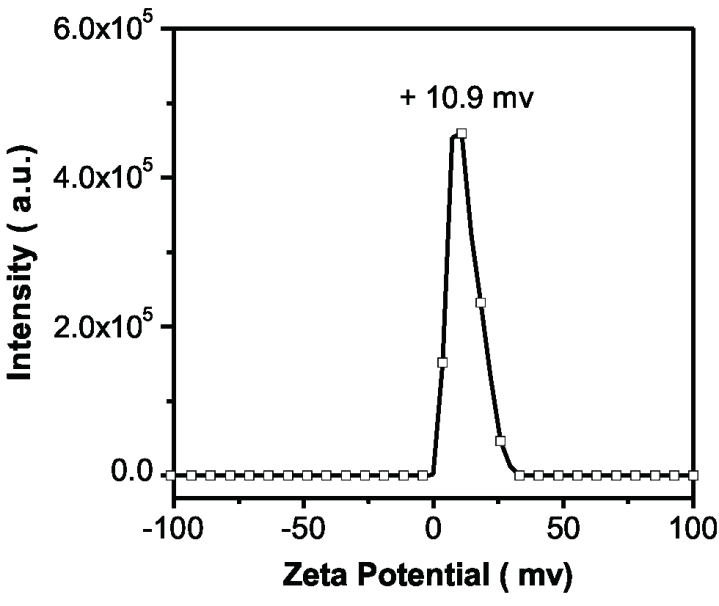


**Figure S2.** Zeta potential of the [Mn]-HMAS nanoparticles in aqueous solution.
